# Supplementary material for: Efficacy of S-1 after Pemetrexed in Patients with Non-small Cell Carcinoma: A Retrospective Multi-institutional Analysis
Source: Research Square preprint supplement (doi:10.21203/rs.3.rs-122720/v1), 2020-12-28
Supplement: Supplementary file 2 [file 98891f8bed29e157741e2bd2.xlsx]

## Sheet: analysis population
sex 1:male 2:female	Pathology 1.adeno 2.others	smoking 1.no 2.yes	EGFR mutaiton 1.no or unkown 2.yes	staging 1:3 2:4 or ralapse	number of cycles of PEM 1:1-4 2:5-	PS S-1	Best Respons 1:CR・PR 2:SD PD	DCR 1:CR・PR・SD 2:PD	Treatment schedule of S-1 1.4W2R 2.2W1R 3.others(discription)	Treatment schedule of S-1 1.4W2R 2.others	S-1 PFS	S-1 PD event 1. yes 2. no	S-1 TTF	Which treatment is S-1 containing rejimen 1:2-4 2:5-	Which treatment is S-1 containing rejimen 1:2 2:3-	OS	best respons (S-1) 1.CR 2.PR 3.SD 4.PD 5.NE 6.nonCR nonPD	"death? 1.yes 2.no"	TTE evevt	amout of time between the last date of PEM administration and the first date of S-1 administration	age S-1
1	1	2	1	2	1	1	2	2	2	2	67	1	62	1	2	1394	4	2	1	11	70.9781
2	1	1	1	2	1	1	2	2	2	2	14	1	14	1	1	69	4	1	1	27	49.0767
1	1	2	2	2	1	1	2	2	1	1	52	1	27	1	2	1113	4	1	1	28	66.6082
1	1	2	1	2	2	1	2	2	2	2	84	1	62	1	2	433	4	1	1	32	59.537
1	1	2	1	2	1	1	2	1	2	2	129	1	109	1	2	131	3	1	1	35	56.6603
1	2	1	1	2	2	1	2	2	1	1	42	1	27	1	2	364	4	1	1	35	67.7479
2	1	2	1	1	1	1	2	2	2	2	43	1	36	1	2	159	4	1	1	39	86.0932
1	1	2	1	2	1	1	2	2	1	1	52	1	48	1	1	387	4	2	1	41	77.9644
1	2	2	1	2	1	1	1	1	1	1	177	1	176	1	2	1065	2	2	1	42	68.0767
2	1	1	1	2	2	1	2	2	1	1	70	1	70	1	2	307	4	1	1	42	75.1315
1	1	2	2	2	1	1	2	2	2	2	112	1	97	1	2	297	4	1	1	43	81.7534
2	1	2	1	2	2	1	2	1	1	1	34	1	27	1	2	385	3	1	1	49	29.1918
2	1	1	1	2	2	1	2	2	2	2	41	1	41	1	2	771	4	2	1	49	50.8603
1	1	2	1	2	1	1	2	2	2	2	53	1	15	1	1	159	4	1	1	51	62.474
2	1	1	1	2	1	1	2	1	2	2	361	1	361	1	2	372	3	1	1	52	81.5151
1	1	1	1	2	1	1	2	1	1	1	62	1	62	1	2	218	4	1	1	56	71.737
1	1	2	1	2	2	2	2	1	3	2	119	2	104	1	1	270	3	2	1	58	81.4027
1	1	2	1	2	2	1	2	2	1	1	118	1	119	1	1	643	4	1	1	60	45.2164
1	1	2	1	2	2	1	2	1	1	1	84	1	69	1	1	490	3	1	1	63	54.2247
1	1	2	1	2	2	2	2	2	3	2	35	1	24	1	2	70	4	1	1	64	65.6301
2	1	2	1	1	2	2	2	1	2	2	82	1	65	1	2	285	3	1	1	86	70.5781
1	1	2	1	2	2	1	2	1	1	1	126	1	112	1	2	756	3	2	1	105	60.2658
1	1	2	1	2	2	1	2	2	1	1	86	1	72	1	2	307	4	1	1	109	47.0329
1	1	2	1	2	2	1	2	2	2	2	63	1	49	1	2	107	4	1	1	112	89.3973
1	1	2	1	1	2	1	2	2	1	1	63	1	62	1	2	175	4	2	1	116	74.6164
1	1	2	1	1	1	1	2	2	2	2	87	1	62	1	2	139	4	2	1	118	71.8932
2	1	1	2	2	1	1	2	2	2	2	38	1	37	1	2	142	4	2	1	148	81.4384
1	2	2	1	2	1	1	2	1	1	1	195	1	168	1	2	292	3	1	1	159	64.2548
1	1	2	1	2	1	1	2	1	1	1	119	1	118	1	2	679	3	1	1	162	74.6685
1	1	2	1	1	2	1	2	2	1	1	85	1	70	1	2	586	4	1	1	162	75.4521
1	1	2	1	2	2	1	2	1	1	1	266	1	294	1	2	637	3	2	1	165	79.1397
2	2	2	1	1	1	1	2	1	2	2	58	2	37	1	2	428	3	1	1	173	84.4438
1	1	2	2	2	1	1	2	2	1	1	42	1	27	1	2	79	4	1	1	182	60.9342
1	1	1	1	2	2	1	2	1	2	2	168	1	161	1	2	281	3	1	1	197	78.6
1	1	2	1	1	1	1	2	1	1	1	50	2	29	1	1	169	3	2	1	202	64.4384
1	1	1	2	2	1	2	2	2	2	2	80	2	39	1	2	665	4	2	1	213	84.3616
2	1	1	2	2	1	0	2	1	1	1	189	1	181	1	2	844	3	2	1	217	72.6658
2	1	2	1	2	2	1	2	2	1	1	80	1	80	1	2	178	4	2	1	220	58.6849
1	1	2	1	2	1	1	2	2	1	1	80	1	26	1	1	90	4	1	1	244	67.9781
1	1	2	1	2	1	1	2	1	3	2	83	1	34	1	2	134	3	1	1	278	63.9342
2	1	2	1	1	1	2	2	2	1	1	77	1	70	1	2	581	4	2	1	287	76.463
1	1	2	1	1	1	0	2	2	1	1	97	1	97	1	1	368	4	1	1	310	56.6192
1	1	1	1	2	2	1	2	1	2	2	113	1	78	1	2	218	3	1	1	314	78.8466
2	2	1	1	2	1	1	2	2	1	1	76	1	62	1	2	127	3	1	1	315	68.4712
2	1	2	1	2	1	1	2	2	2	2	77	1	76	1	2	610	4	1	1	335	56.2329
1	1	2	1	2	1	0	2	2	1	1	98	1	87	1	1	861	4	2	1	354	72.9507
1	2	2	1	2	1	1	2	1	1	1	41	2	25	1	2	102	3	1	1	405	69.463
2	1	2	1	2	2	2	2	1	1	1	170	1	155	1	2	583	3	2	1	451	75.2849
2	1	1	1	2	2	1	2	2	1	1	20	1	20	1	1	496	4	2	1	539	77.9562
1	1	2	1	2	2	1	2	2	1	1	41	1	27	1	2	321	4	1	1	553	70.3041
1	1	2	1	1	2	1	2	2	1	1	154	1	140	1	2	155	4	1	1	560	68.7534
2	1	2	1	2	2	1	2	1	3	2	244	1	242	1	2	789	3	1	1	576	65.4192
1	1	2	2	2	1	1	2	1	1	1	196	1	196	1	2	1426	3	2	1	625	70.0082
																				148
